# Supplementary material
Source: PubMed Central journal article supplement (PMC3839572)
Supplement: NIHMS523432-supplement-supplement_1.pdf [file NIHMS523432-supplement-supplement_1.pdf]

## Supplementary Methods

### Subject Screening

Medical history and physical examination were performed by an experienced physician. Standardized psychiatric screening was performed using the Mini International Neuropsychiatric Interview Plus to assess for a psychiatric disorder (eg, depression, dysthymia, anxiety, panic disorder, disorder of mania or bipolar disorder, phobia, post-traumatic stress disorder, substance abuse, eating disorder). Lactose intolerance, chronic gastrointestinal symptoms, chronic or acute pain disorder, psychiatric disorder, or other active medical condition were exclusionary. Only nonobese women were eligible for the study (ie, body mass index 18–30).

### Diary and Symptom Data

Symptoms of anxiety and depression were assessed using the Hospital Anxiety and Depression scale at the pre and post-intervention visits. Analysis of variance was implemented in SPSS using the baseline Hospital Anxiety and Depression score as a covariate to determine group effects on anxiety and depression. Daily diary data for abdominal bloating, rumbling or gurgling stomach, gas or flatulence, abdominal pain or discomfort, and bowel movement satisfaction were recorded by the subjects in an automatic phone diary using a verbal descriptor anchored a 0 to 20-point scale for no symptoms to “extremely bothersome” symptoms, except for bowel movement satisfaction, which was a –10 to +10 scale anchored by “extremely dissatisfied” to “extremely satisfied.” Change in these measures was assessed using general linear mixed model for repeated measures data in SPSS using weekly means for each variable. Threshold of significance was set at  $P < .05$ .

## Results

### Response to the Emotional Faces Attention Task

To confirm adequate task performance, a group analysis was performed at baseline. The emotional attention task resulted in activation of brain regions associated with emotion regulation, including the pregenual cingulate and medial prefrontal cortices (Supplementary Table 1). As reported previously, variability in amygdala activation by the paradigm was seen, with some subjects displaying activation and some deactivation of the amygdala, resulting in a nonsignificant task-induced mean change in amygdala activity. Regions showing activation during the task at baseline are shown in Table 1.

### FMPP Reduces Reactivity of a Widely Distributed Network of Brain Regions to an Emotional Attention Task

Regions in the network shown in Figure 1 are detailed in Supplementary Table 2.

### Ingestion of FMPP Is Associated With Altered Reactivity of Interoceptive and Somatosensory Regions to an Emotional Attention Task

Regional differences between groups are detailed in Supplementary Table 3.

### Ingestion of FMPP Is Associated With Alterations in a PAG-Seeded Resting-State Network

Regions shown in Supplementary Figure 3 are detailed in Supplementary Tables 4A and B.

### Symptom Reports

No differences was observed in anxiety and depression scores between groups at baseline (anxiety  $F = 1.34$ ;  $df 2$ ;  $P = .275$ ; depression  $F = .239$ ,  $df 2$ ;  $P = .798$ ). Overall mean baseline scores were low and none met criteria for likely clinical case (mean anxiety, 2.66; standard deviation, 2.5; mean depression, 1.26; standard deviation, 1.8). No effect of intervention group was observed on anxiety ( $F = 1.47$ ,  $df 2$ ;  $P = .245$ ) or depression symptoms ( $F = .408$ ,  $df 2$ ;  $P = .668$ ). Baseline gastrointestinal symptoms were low and there were no group differences. Mean (standard deviation) for the gastrointestinal symptoms during the run in period were: bloating = .30 (.44), rumbling .39 (.58), gas/flatulence = .97 (.98), abdominal pain/discomfort = .18 (.29), bowel movement satisfaction = 6.8 (2.8). No effect of intervention group was seen for any of the gastrointestinal variables during the course of the study period: bloating ( $F = .18$ ,  $df 2$ ;  $P = .84$ ) rumbling ( $F = .98$ ,  $df 2$ ;  $P = .39$ ), gas/flatulence ( $F = .93$ ,  $df 2$ ;  $P = .40$ ), abdominal pain/discomfort ( $F = .41$ ,  $df 2$ ;  $P = .67$ ), bowel movement satisfaction ( $F = .24$ ,  $df 2$ ;  $p = .80$ ).

### Safety

The main emergent adverse events were similar between groups and are reported by number of subjects in the FMPP and Control groups, respectively: gastrointestinal (1 event, 2 events), nervous system disorders (1 event, 2 events), and pharyngolaryngeal pain (2 events, 0 events). The FMPP and Control products were safe and well tolerated.

**Supplementary Table 1.** Regions Showing Greater BOLD Activity During the Match Emotions Conditions Compared With Match Forms Condition

| Brain region                             | X   | Y   | Z   | Cluster extent | Z score | <i>P</i> (fwe) |
|------------------------------------------|-----|-----|-----|----------------|---------|----------------|
| Whole-brain analysis                     |     |     |     |                |         |                |
| Anterior cingulate, BA 32                | -2  | 52  | -12 | 261            | 4.89    | .003           |
| Precuneus                                | 6   | -52 | 46  | 160            | 3.76    | .030           |
| Dorsomedial PFC                          | 4   | 62  | 22  | 250            | 4.09    | .004           |
| Dorsolateral PFC                         | -30 | 60  | 14  | 125            | 4.56    | .074           |
| Cerebellum                               | -16 | -90 | -20 | 270            | 4.33    | .002           |
| Region of interest analysis <sup>a</sup> |     |     |     |                |         |                |
| Pregenua cingulate                       | -2  | 52  | -12 | 182            | 4.89    | <.001          |
| Subgenual cingulate                      | -6  | 34  | -10 | 22             | 3.93    | .012           |
| Dorsolateral PFC                         | -30 | 60  | 14  | 96             | 4.56    | .008           |
|                                          | 24  | 34  | 46  | 224            | 4.62    | <.001          |

BA, Brodmann area; fwe, cluster correction using family-wise error; PFC, prefrontal cortex.

<sup>a</sup>No significant findings for amygdala, insula, and somatosensory cortex.

**Supplementary Table 2.** Brain Regions From an Emotional Reactivity Network With Decreased Activity in the FMPP Group Compared With No-Intervention and Control Groups

| Brain region                          | X   | Y   | Z   | Bootstrap ratio | Approximate <i>P</i> value | Cluster size |
|---------------------------------------|-----|-----|-----|-----------------|----------------------------|--------------|
| Insula                                |     |     |     |                 |                            |              |
| Mid                                   | 50  | 2   | 0   | -5.3239         | <.0001                     | 247          |
| Posterior                             | -42 | -18 | -2  | -3.6909         | .0002                      | 40           |
|                                       | -48 | -2  | 14  | -3.5396         | .0004                      | 57           |
| Primary somatosensory and association |     |     |     |                 |                            |              |
| BA 2                                  | 56  | -20 | 38  | -7.4125         | <.0001                     | 2168         |
|                                       | -60 | -20 | 32  | -6.5169         | <.0001                     | 1519         |
| BA 6                                  | 28  | 0   | 68  | -3.9636         | .0001                      | 34           |
|                                       | 20  | 20  | 52  | -3.741          | .0002                      | 55           |
|                                       | -8  | 10  | 54  | -5.5904         | <.0001                     | 1629         |
| Cerebellum                            |     |     |     |                 |                            |              |
| Declive                               | -20 | -68 | -18 | -8.5886         | <.0001                     | 6998         |
| Culmen                                | 34  | -62 | -22 | -5.6182         | <.0001                     | 869          |
| Midbrain                              |     |     |     |                 |                            |              |
| PAG                                   | -4  | -26 | -6  | -5.3583         | <.0001                     | 94           |
| Parahippocampal gyrus                 |     |     |     |                 |                            |              |
| BA 35                                 | 20  | -24 | -20 | -3.8944         | .0001                      | 59           |
| BA 27                                 | -10 | -38 | 0   | -4.1351         | <.0001                     | 41           |
| Basal ganglia                         |     |     |     |                 |                            |              |
| Putamen                               | 32  | -10 | 0   | -3.0066         | .0026                      | 22           |
|                                       | 34  | -6  | -10 | -5.1755         | <.0001                     | 58           |
| Frontal cortex                        |     |     |     |                 |                            |              |
| BA 44                                 | -54 | 10  | 16  | -3.9533         | .0001                      | 38           |
| BA 8                                  | 26  | 14  | 46  | -4.4712         | <.0001                     | 59           |
|                                       | -22 | 24  | 48  | -3.1785         | .0015                      | 88           |
| BA 9/10                               | 38  | 44  | 22  | -3.453          | .0006                      | 73           |
| BA 11                                 | 32  | 46  | -16 | -3.7562         | .0002                      | 30           |
| Temporal lobe                         |     |     |     |                 |                            |              |
| BA 38                                 | 38  | 8   | -24 | -3.9417         | .0001                      | 51           |
| BA 22                                 | 54  | -14 | -6  | -6.1559         | <.0001                     | 114          |
|                                       | -60 | -14 | 4   | -3.9333         | .0001                      | 39           |
| Clastrum                              | -36 | -10 | -12 | -3.482          | .0005                      | 20           |
| Precuneus                             |     |     |     |                 |                            |              |
| BA 31                                 | -12 | -42 | 42  | -4.2555         | <.0001                     | 145          |

BA, Brodmann area.

**Supplementary Table 3.** Regions Identified Using Small Volume Correction Showing Significantly Less Activity in the FMPP Group During Reactivity Are Listed

| Brain region                     | X   | Y   | Z  | Cluster extent | Z score | P value (fwe) <sup>a</sup> |
|----------------------------------|-----|-----|----|----------------|---------|----------------------------|
| <b>No intervention &gt; FMPP</b> |     |     |    |                |         |                            |
| Insula–mid                       | 46  | 2   | 4  | 30             | 4.614   | .004                       |
| Insula–posterior                 | 40  | –16 | 12 | 12             | 3.731   | .020                       |
| Somatosensory cortex–BA2/3       | –56 | –20 | 36 | 78             | 3.922   | .005                       |
|                                  | 60  | –26 | 42 | 171            | 4.856   | <.001                      |
| <b>Control &gt; FMPP</b>         |     |     |    |                |         |                            |
| Insula–mid                       | 46  | 2   | 0  | 1              | 3.155   | .032                       |
| Insula–posterior                 | 34  | –18 | 20 | 4              | 3.504   | .039                       |
| Somatosensory cortex–BA2/3       | –56 | –24 | 34 | 7              | 3.291   | .142                       |
|                                  | 62  | –20 | 38 | 48             | 4.509   | .016                       |

BA, Brodmann area; fwe, family-wise error correction.

**Supplementary Table 4A.** The Resting-State Network Regions That Were Positively Correlated to Midbrain Reactivity in the No-Intervention Group Are Shown

| Brain region                                 | X   | Y   | Z   | Bootstrap ratio | P value | Cluster size |
|----------------------------------------------|-----|-----|-----|-----------------|---------|--------------|
| <b>Limbic regions</b>                        |     |     |     |                 |         |              |
| Amygdala                                     | 26  | 0   | –22 | 4.5239          | <.0001  | 21           |
| Cingulate gyrus                              | –8  | –24 | 32  | 5.268           | <.0001  | 99           |
|                                              | –8  | –28 | 42  | 3.7114          | .0002   | 27           |
| Hippocampus                                  | –36 | –14 | –18 | 6.3626          | <.0001  | 67           |
| Parahippocampal gyrus                        | 18  | –38 | –6  | 6.9908          | <.0001  | 214          |
|                                              | 30  | –34 | –10 | 3.7757          | .0002   | 22           |
| <b>Basal ganglia</b>                         |     |     |     |                 |         |              |
| Caudate                                      | –10 | 16  | –6  | 4.8236          | <.0001  | 20           |
| Putamen                                      | –34 | –18 | 6   | 4.0582          | <.0001  | 25           |
|                                              | 36  | –14 | –2  | 5.1452          | <.0001  | 123          |
| Medial globus pallidus                       | 22  | –8  | –8  | 3.6033          | .0003   | 24           |
| <b>Somatosensory and association regions</b> |     |     |     |                 |         |              |
| Insula (post/mid)                            | 42  | 8   | 12  | 5.4835          | <.0001  | 50           |
|                                              | 32  | –6  | 14  | 8.3758          | <.0001  | 183          |
| Primary somatosensory                        | 40  | –24 | 38  | 6.592           | <.0001  | 31           |
|                                              | –22 | –30 | 70  | 8.021           | <.0001  | 890          |
|                                              | 60  | –12 | 40  | 3.3716          | <.0007  | 22           |
| Supplementary motor area                     | 12  | 22  | 54  | 5.1483          | <.0001  | 49           |
|                                              | –40 | –12 | 36  | 5.0524          | <.0001  | 134          |
| Occipital/Brodmann 18/19                     | –12 | –78 | 38  | 7.838           | <.0001  | 2742         |
|                                              | 20  | –88 | 34  | 6.4068          | <.0001  | 508          |
| Midbrain                                     | 8   | –30 | –8  | 4.0335          | .0001   | 25           |
|                                              | 8   | –16 | –8  | 3.7286          | .0002   | 43           |
| Thalamus medial dorsal nucleus               | –10 | –18 | 12  | 5.3802          | <.0001  | 50           |
| <b>Cerebellum</b>                            |     |     |     |                 |         |              |
| Vermis/culmen                                | 6   | –56 | –12 | 5.5832          | <.0001  | 65           |
|                                              | –6  | –68 | –26 | 5.5087          | <.0001  | 60           |
| <b>Cognitive and attentional regions</b>     |     |     |     |                 |         |              |
| Brodmann area 40                             | –60 | –30 | 28  | 5.4903          | <.0001  | 56           |
|                                              | –54 | –34 | 24  | 4.8573          | <.0001  | 72           |
| Prefrontal cortex                            | 12  | 58  | 0   | 6.9269          | <.0001  | 21           |
|                                              | 40  | 54  | –2  | 5.1201          | <.0001  | 21           |

NOTE. This network was negatively correlated with midbrain reactivity in the FMPP group (see Figure 2). In regions with more than one significant cluster only the largest is shown.

**Table 4B.** Resting-State Network Regions That Correlate Positively With Midbrain Reactivity in the FMPP Group Are Shown

| Brain region                   | X   | Y  | Z  | Bootstrap ratio | Approximate <i>P</i> value | Cluster size |
|--------------------------------|-----|----|----|-----------------|----------------------------|--------------|
| Dorsolateral prefrontal cortex | -44 | 26 | 42 | -6.1804         | <.0001                     | 21           |
|                                | 26  | 12 | 58 | -5.3489         | <.0001                     | 21           |
|                                | 40  | 22 | 32 | -4.9707         | <.0001                     | 22           |
| Medial prefrontal cortex       | -10 | 42 | 26 | -4.0408         | .0001                      | 39           |
